# Supplementary material for: Enhanced adsorption of carbon sphere by doping with titania nanotubes for crystal violet removal: isotherm, kinetics, and thermodynamic studies
Source: Royal Society of Chemistry journal article supplement (doi:10.1039/d4ra04889j), 2024-01-01
Supplement: d4ra04889j1.pdf [file d4ra04889j1.pdf]

## Supplementary data

### **Enhanced adsorption of carbon sphere by doping with titania nanotubes for crystal violet removal: Isotherm, kinetics, and thermodynamic studies**

**Ahmed M. E. Mohamed<sup>1</sup>, Ahmed Kotb<sup>1</sup>, Mohamed Abdel-Hakim<sup>1</sup>, Moustafa M. S. Sanad<sup>2</sup>, Abdelaal S. A. Ahmed<sup>1\*</sup>**

<sup>1</sup> Chemistry Department, Faculty of Science, Al-Azhar University, Assiut 71524, Egypt

<sup>2</sup> Central Metallurgical Research and Development Institute, P.O. Box 87 Helwan, 11421, Cairo, Egypt

Correspondence: [abdelalsaiyd@azhar.edu.eg](mailto:abdelalsaiyd@azhar.edu.eg) (A. S. A. Ahmed)

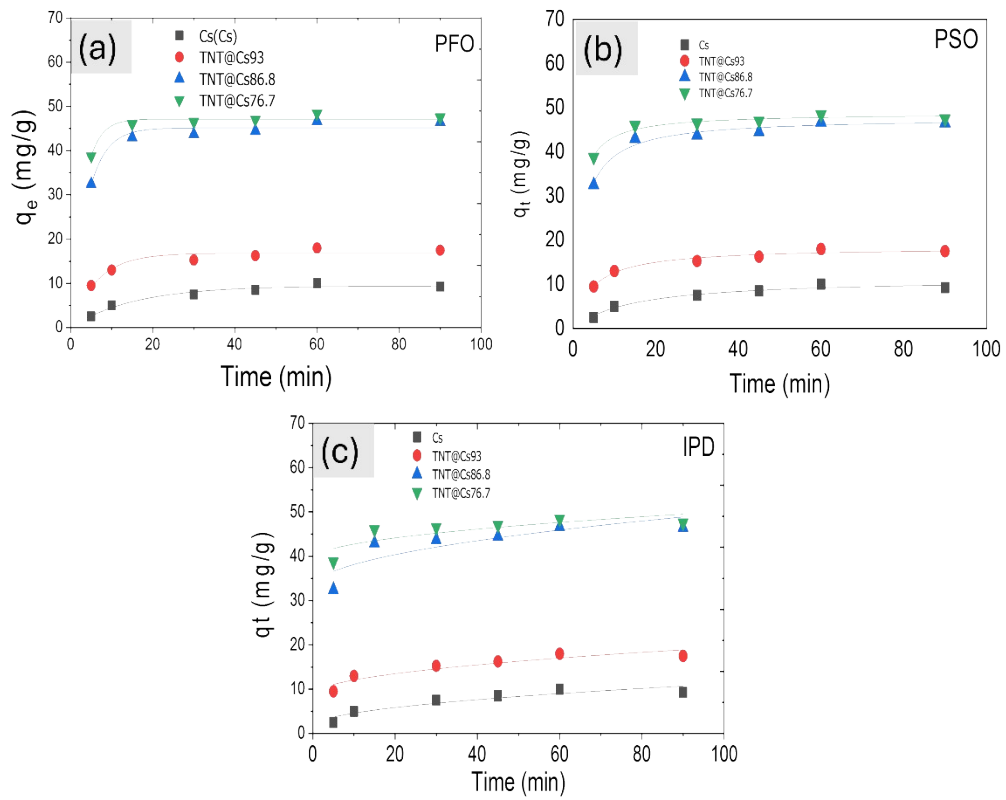

**Figure S1:** The non-linear kinetics fitting curves for the (a) PFO, (b) PSO, and (c) IPD models.

**Table S1:** The parameters estimated from the non-linear adsorption kinetic models for the adsorption of CV dye.

| Adsorbent               | Pseudo first order |         |       | Pseudo second order |                          |       | Intraparticle diffusion |                          |       |
|-------------------------|--------------------|---------|-------|---------------------|--------------------------|-------|-------------------------|--------------------------|-------|
|                         | $q_{e,cal}$        | $K_1$   | $R^2$ | $q_{e,cal}$         | $k_2$                    | $R^2$ | $C$                     | $k_p$                    | $R^2$ |
|                         | (mg/g)             | (1/min) |       | (mg/g)              | (mgg <sup>-1</sup> /min) |       | (mg/g)                  | (mgg <sup>-1</sup> /min) |       |
| Cs                      | 9.42               | 0.064   | 0.957 | 11.38               | 0.006                    | 0.958 | 1.52                    | 0.965                    | 0.834 |
| TNTs@Cs <sub>93</sub>   | 16.82              | 0.156   | 0.892 | 18.42               | 0.012                    | 0.959 | 8.65                    | 1.08                     | 0.833 |
| TNTs@Cs <sub>86.8</sub> | 45.15              | 0.250   | 0.929 | 47.73               | 0.009                    | 0.962 | 32.78                   | 1.70                     | 0.648 |
| TNTs@Cs <sub>76.7</sub> | 47.15              | 0.343   | 0.941 | 48.74               | 0.017                    | 0.957 | 39.36                   | 1.068                    | 0.557 |

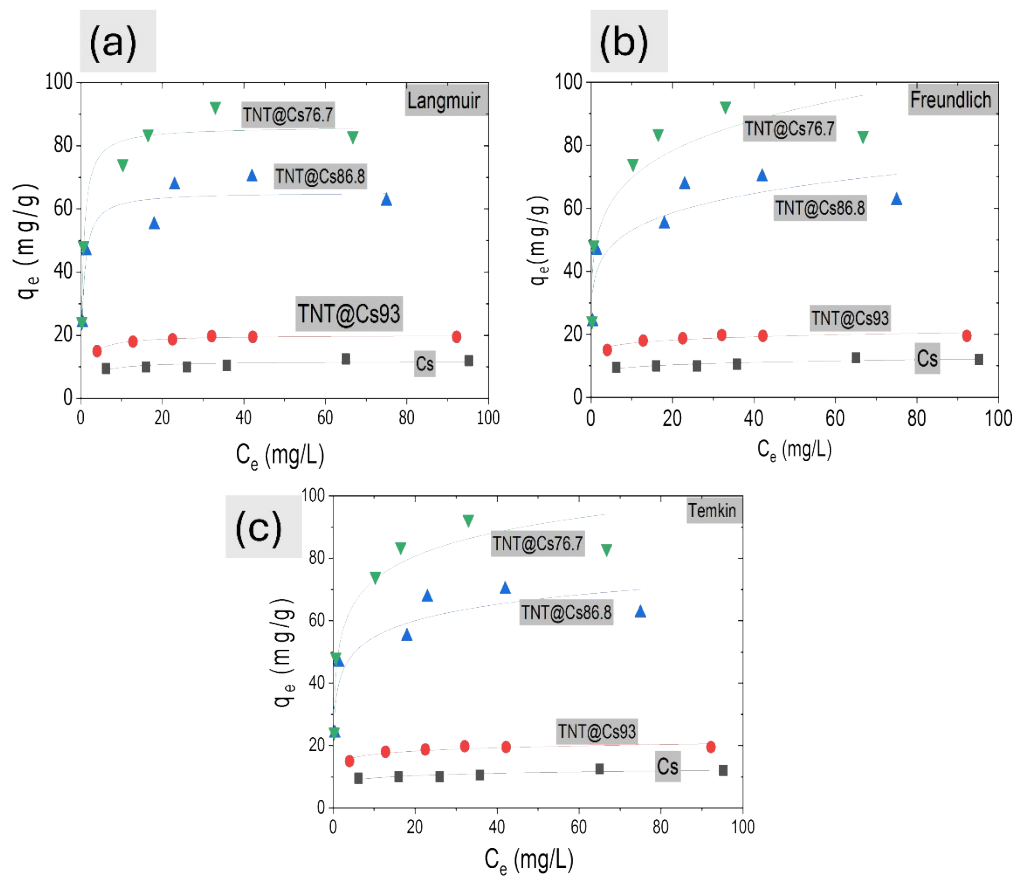

**Figure S2:** The non-linear isotherm curves for the (a) Langmuir, (b) Freundlich, and (c) Temkin models.

**Table S2:** The parameters estimated from the non-linear adsorption isotherm models for the adsorption of CV dye.

| Adsorbent               | Freundlich model |       |       | Langmuir model  |                 |        | Temkin model |                |       |
|-------------------------|------------------|-------|-------|-----------------|-----------------|--------|--------------|----------------|-------|
|                         | $K_f$<br>(mg/g)  | $n$   | $R^2$ | $K_L$<br>(L/mg) | $q_m$<br>(mg/g) | $R^2$  | $b_t$        | $A_T$<br>(L/g) | $R^2$ |
| Cs                      | 7.494            | 9.434 | 0.757 | 0.513           | 11.764          | 0.449  | 1.092        | 652.89         | 0.732 |
| TNTs@Cs <sub>93</sub>   | 14.27            | 12.43 | 0.750 | 0.737           | 20.063          | 0.971  | 1.518        | 8130.14        | 0.790 |
| TNTs@Cs <sub>86.8</sub> | 38.08            | 6.96  | 0.746 | 1.612           | 65.345          | 0.892  | 7.565        | 139.140        | 0.805 |
| TNTs@Cs <sub>76.7</sub> | 47.32            | 5.94  | 0.820 | 1.773           | 86.036          | 0.9513 | 11.148       | 69.568         | 0.897 |
